# Supplementary material for: The PHD1 finger of KDM5B recognizes unmodified H3K4 during the demethylation of histone H3K4me2/3 by KDM5B
Source: Springer Nature journal article supplement (doi:10.1007/s13238-014-0078-4), 2014-06-21
Supplement: MOESM1 [file 13238_2014_78_MOESM1_ESM.pdf]

The PHD1 finger of KDM5B recognizes unmodified H3K4 during demethylation of histone H3K4me2/3 by KDM5B

Yan Zhang<sup>1§</sup>, Huirong Yang<sup>2§</sup>, Xue Guo<sup>2§</sup>, Naiyan Rong<sup>1</sup>, Yujiao Song<sup>1</sup>, Youwei Xu<sup>2</sup>, Wenxian Lan<sup>1</sup>, Xu Zhang<sup>3</sup>, Maili Liu<sup>3</sup>, Yanhui Xu<sup>2\*</sup>, Chunyang Cao<sup>1\*</sup>

**Supplementary materials and methods**

**<sup>1</sup>H-<sup>15</sup>N LR HSQC experiments of histidines in PHD1<sub>KDM5B</sub>**

To determine which nitrogen atom in the side-chain of His335 ligates to Zn<sup>2+</sup> (Note, it is His335, not His344, which is conserved in JARID1 family member, thus His335 is more possible to ligate with zinc ion), we investigate the electronic properties of histidines in PHD1<sub>KDM5B</sub> in free state and in complex with unmodified H3K4me0 by performing two-dimensional <sup>1</sup>H-<sup>15</sup>N LR HSQC experiments. The NMR sample contains ~0.5 mM PHD1<sub>KDM5B</sub> in NMR buffer (20mM Na<sub>2</sub>HPO<sub>3</sub>, 100mM NaCl, 0.01% NaN<sub>3</sub>, pH 7.4 and 10% D<sub>2</sub>O). The experiments were conducted at 20 °C on a Varian Unity Inova 600 spectrometer equipped with three channels and pulse-field gradient. This experiment was simply a conventional HSQC used for backbone amide correlations collected with an optimized two-bond <sup>2</sup>J<sub>NH</sub> value of 22Hz in order to observe signals from the weak two-bond couplings in the histidine rings and suppress the signals from the one-bond J<sub>NH</sub> amide couplings. The <sup>15</sup>N dimension was collected with 256 complex points, 120-ppm sweep width, 128 scans, and the <sup>15</sup>N carrier set at 205 ppm. The <sup>1</sup>H dimension was collected with 1024 complex points and 13.3-ppm sweep width centered at 4.82 ppm. The assignments were performed based on NOEs between the H $\beta$  and aromatic proton H $\delta$ . The final electrostatic properties of two histidines in PHD1<sub>KDM5B</sub> were identical, and the structure of the side-chain was drawn in the Figure S2.

**Figure S1** Structural analysis of free PHD1<sub>KDM5B</sub>. (A) Ribbon representation of the structure of free PHD1<sub>KDM5B</sub> determined by NMR (right) and X-ray crystallography

(left), respectively. (B) Comparison of free PHD1<sub>KDM5B</sub> structures obtained by NMR (red) and X-ray crystallography (blue), respectively, by superimposing the backbone C<sub>α</sub> atoms in secondary structural region. (C) Comparison of free PHD1<sub>KDM5B</sub> (red) and bound PHD1<sub>KDM5B</sub> (green) structures, by superimposing the backbone C<sub>α</sub> atoms in secondary structural region.

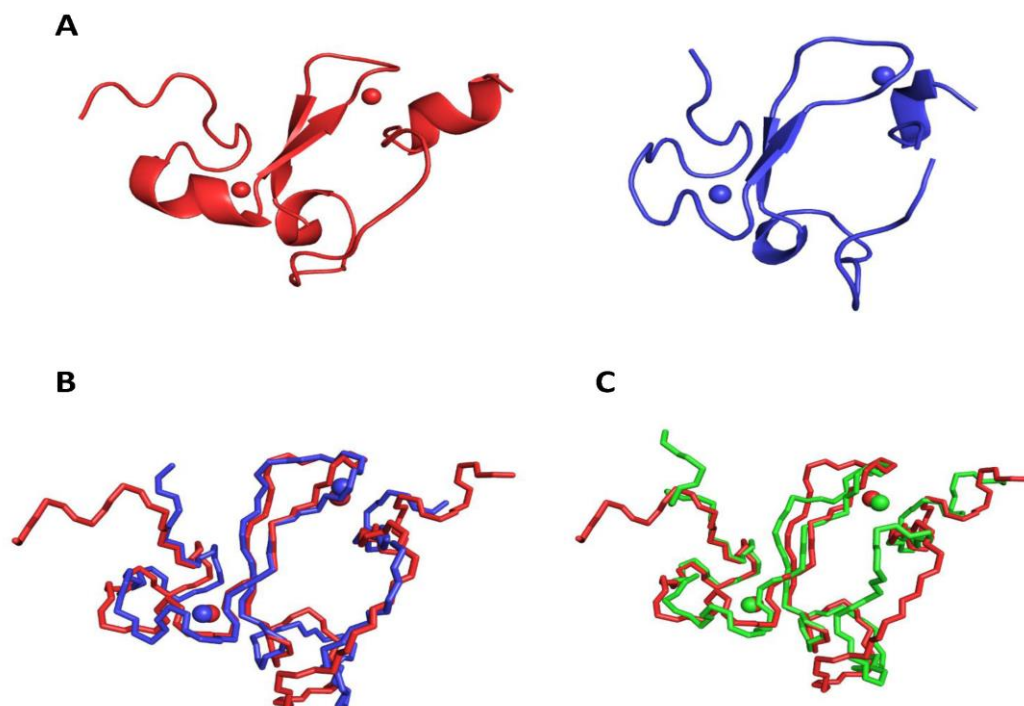

**Supplemental Figure S2** <sup>1</sup>H-<sup>15</sup>N LR HSQC experiments of histidines in PHD1<sub>KDM5B</sub>. The final electronic property of histidine side-chain was drawn in the spectrum.

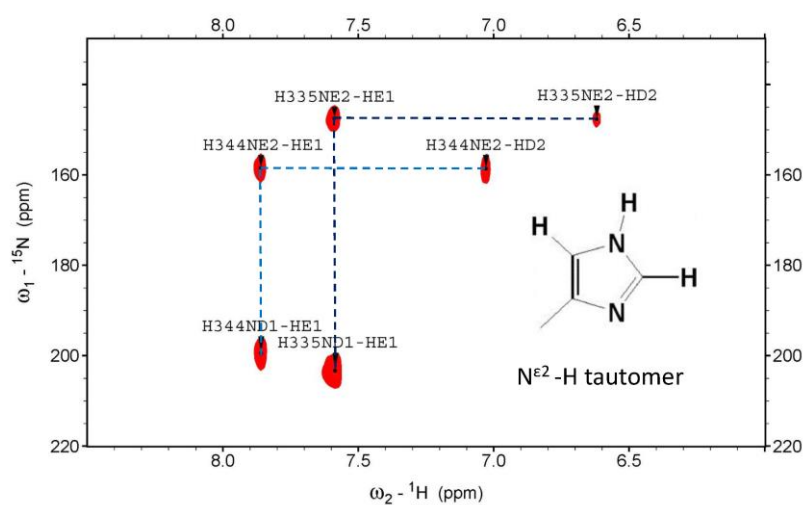

Table S1 Binding affinities for PHD1<sub>KDM5B</sub> or its mutants to H3 peptides (1-10aa).

| KDM5B-PHD1 mutant | Peptide           | $K_D$ ( $\mu$ M) |
|-------------------|-------------------|------------------|
| KDM5B-PHD1        | H3K4(1-10aa)      | 6.4 $\pm$ 0.6    |
| KDM5B-PHD1-D308A  | H3K4(1-10aa)      | 41.7 $\pm$ 2.2   |
| KDM5B-PHD1-L309A  | H3K4(1-10aa)      | 8.3 $\pm$ 0.5    |
| KDM5B-PHD1-Y310F  | H3K4(1-10aa)      | 4.3 $\pm$ 0.2    |
| KDM5B-PHD1-Y310A  | H3K4(1-10aa)      | 28.1 $\pm$ 1.3   |
| KDM5B-PHD1-V311A  | H3K4(1-10aa)      | 8.2 $\pm$ 0.3    |
| KDM5B-PHD1-E321A  | H3K4(1-10aa)      | 75.8 $\pm$ 5.7   |
| KDM5B-PHD1-D322A  | H3K4(1-10aa)      | 10.7 $\pm$ 0.5   |
| KDM5B-PHD1-L324A  | H3K4(1-10aa)      | 15.3 $\pm$ 0.7   |
| KDM5B-PHD1-L325A  | H3K4(1-10aa)      | N. D.            |
| KDM5B-PHD1-L326A  | H3K4(1-10aa)      | 14.1 $\pm$ 0.8   |
| KDM5B-PHD1-D328A  | H3K4(1-10aa)      | 182.1 $\pm$ 21.9 |
| KDM5B-PHD1-D332A  | H3K4(1-10aa)      | 11.3 $\pm$ 0.5   |
| KDM5B-PHD1-S333A  | H3K4(1-10aa)      | 12.9 $\pm$ 0.5   |
| KDM5B-PHD1-Y334A  | H3K4(1-10aa)      | 12.6 $\pm$ 0.4   |
| KDM5B-PHD1-D345A  | H3K4(1-10aa)      | 6.7 $\pm$ 0.3    |
| KDM5B-PHD1-W351A  | H3K4(1-10aa)      | N. D.            |
| KDM5B-PHD1        | H3K4 (1-10aa) A1G | 304.9 $\pm$ 11.7 |
| KDM5B-PHD1        | H3K4 (1-10aa) R2A | 370.4 $\pm$ 52.1 |
| KDM5B-PHD1        | H3K4 (1-10aa) R2E | N. D.            |
| KDM5B-PHD1        | H3K4 (1-10aa) T3V | 57.1 $\pm$ 2.2   |
| KDM5B-PHD1        | H3K4 (1-10aa) K4A | 15.9 $\pm$ 1.2   |
| KDM5B-PHD1        | H3K4 (1-10aa) K4E | N. D.            |
| KDM5B-PHD1        | H3K4 (1-10aa) Q5E | 21.4 $\pm$ 1.7   |
| KDM5B-PHD1        | H3K4 (1-10aa) T6V | 61.3 $\pm$ 1.6   |

N.D. means non-detectable
